# Supplementary material for: Multilevel regulation of an α-arrestin by glucose depletion controls hexose transporter endocytosis
Source: PubMed Central journal article supplement — J Cell Biol. 2017 Jun 5;216(6):1811–31. doi: 10.1083/jcb.201610094 (PMC5461024; doi:10.1083/jcb.201610094), 2017-06-05
Supplement: JCB_201610094_sm.pdf [file JCB_201610094_sm.pdf]

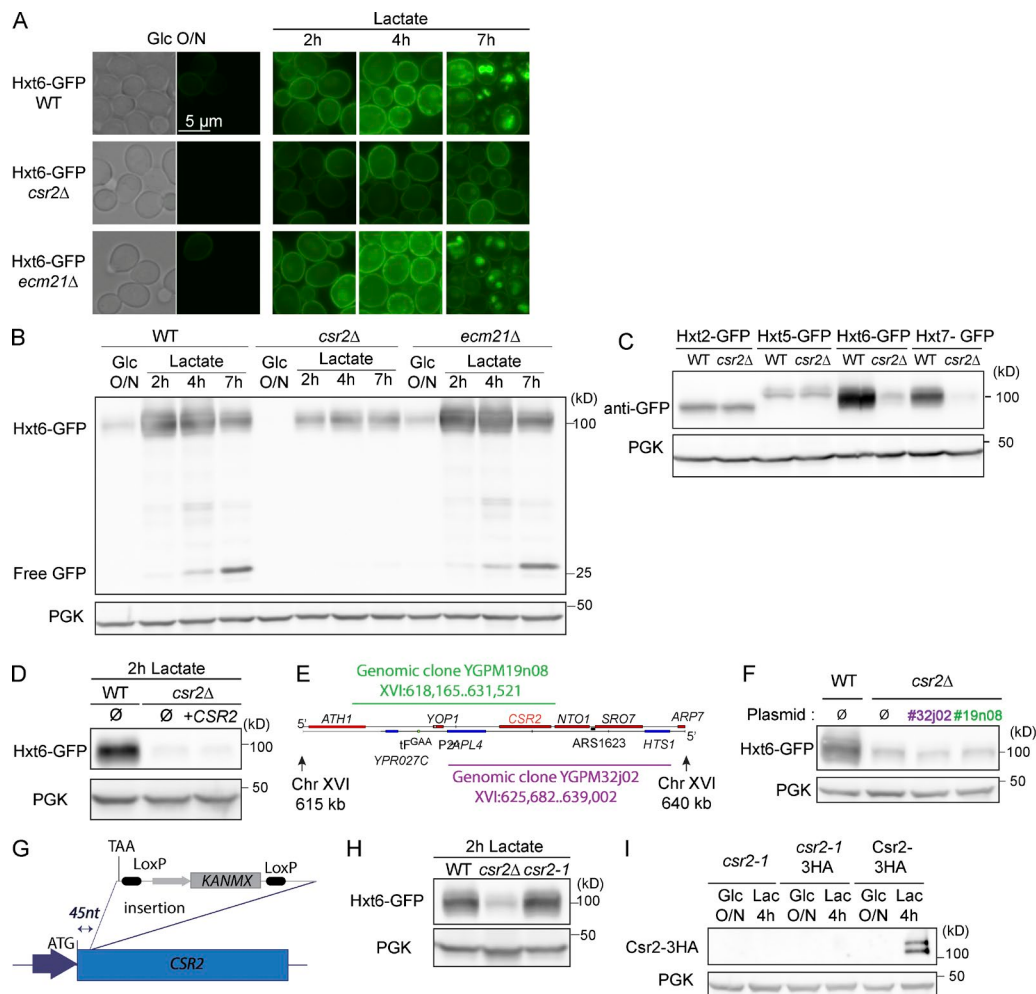

**Figure S1. Requirement of Csr2 for Hxt6 endocytosis after glucose removal, and rationale for the construction of the *csr2-1* mutant.** (A) Hxt6-GFP endocytosis in lactate-containing medium requires Csr2, but not its close paralogue Ecm21. Hxt6-GFP-expressing WT (ySL1184), *csr2Δ* (ySL1185), and *ecm21Δ* (ySL1650) cells were grown overnight in glucose medium (exponential phase) and were switched to lactate-containing medium. Cells were imaged for Hxt6 localization at the indicated times. Hxt6-GFP endocytosis occurs in an *ecm21Δ* mutant but not in *csr2Δ* cells. Note that Hxt6-GFP is expressed at a lower level in the *csr2Δ* strain as compared with WT cells. (B) From the experiment depicted in A, immunoblots were realized on total cell lysates with the indicated antibodies (PGK was used as a loading control). Note that Hxt6-GFP is expressed at a lower level in the *csr2Δ* strain compared with WT cells. (C) Hxt7-GFP is also expressed at a much lower level in the *csr2Δ* strain compared with WT cells. WT and *csr2Δ* cells expressing Hxt6-GFP (ySL1184 and ySL1185), Hxt7-GFP (ySL1551 and ySL1552), Hxt2-GFP (ySL1140 and ySL1654), or Hxt5-GFP (ySL1145 and ySL1653) were grown overnight in glucose medium (exponential phase) and switched to lactate-containing medium for 2 h. Total cell lysates were prepared at the indicated times and immunoblotted with anti-GFP and anti-PGK (loading control) antibodies. (D) The defect in Hxt6-GFP expression observed in the *csr2Δ* mutant is not complemented by a plasmid containing the *CSR2* gene. Hxt6-GFP-expressing WT (ySL1345), *csr2Δ* (ySL1316), or *csr2Δ* cells carrying a plasmid-encoded, unmodified *CSR2* gene (–500/+300; ySL1670) were grown overnight in glucose medium (exponential phase) and switched to lactate-containing medium for 2 h. Total cell lysates were immunoblotted with anti-GFP and anti-PGK (loading control) antibodies. (E) Schematic of the genomic locus around *CSR2*. The regions covered by two genomic clones, YGPM19n08 and YGPM32j02 (from the yeast genomic tiling collection; GE Healthcare) are represented in green and blue, respectively. (F) The defective expression of Hxt6-GFP observed in the *csr2Δ* mutant is not complemented by the genomic clones tested. Hxt6-GFP-expressing WT (ySL1345), *csr2Δ* (ySL1316), or *csr2Δ* cells carrying genomic clones indicated in E (YGPM32j02 or YGPM19n08: ySL1692 and ySL1693) were grown overnight in glucose medium (exponential phase) and switched to lactate-containing medium for 2 h. Total cell lysates were immunoblotted with anti-GFP and anti-PGK (loading control) antibodies. (G) Schematic of the strategy used to generate the *csr2-1* allele. A cassette containing a KanMX cassette, LoxP excision sites, and a stop codon in its 5' was integrated 45 bp away from the start site of *CSR2*. Note that the cassette was not excised and thus is still present in the *csr2-1* mutant. (H) Hxt6-GFP expression is not altered in the *csr2-1* mutant. WT (ySL1184), *csr2Δ* (ySL1185), and *csr2-1* (ySL1706) cells expressing Hxt6-GFP were grown overnight in glucose medium (exponential phase) and were switched to lactate-containing medium for 2 h. Total cell lysates were prepared at this time and immunoblotted with anti-GFP and anti-PGK (loading control) antibodies. (I) Csr2 is not expressed in the disrupted mutant *csr2-1*. A 3HA-tagging cassette was introduced in 3' of the *CSR2* ORF, in both the WT and the *csr2-1* genomic context. In both cases, the correct and in-frame insertion of the cassette with the *CSR2* ORF was verified by PCR and sequencing. The indicated strains (*csr2-1*: ySL1706; *csr2-1* 3HA: ySL1717; Csr2-3HA: ySL1037) were grown in lactate medium for 4 h, and total cell lysates were immunoblotted with anti-HA and anti-PGK (loading control) antibodies.

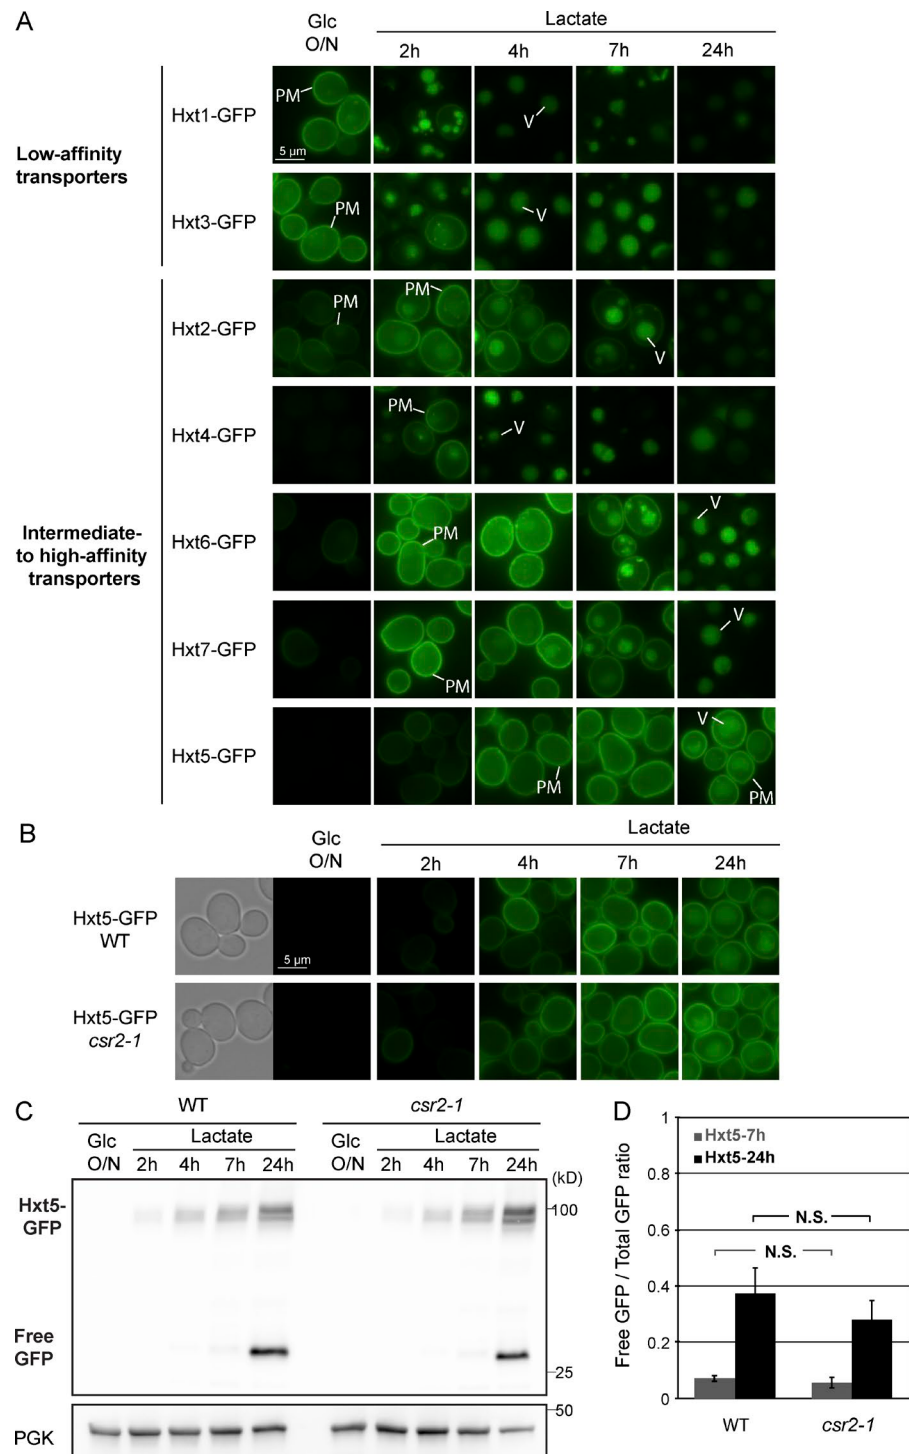

Figure S2. **Cargo selectivity of the ART Csr2 during endocytosis in the absence of glucose.** (A) Comparison of the expression and localization of seven hexose transporters (Hxt1 to Hxt7) fused to GFP. Cells were grown overnight in glucose medium (exponential phase) and then switched to lactate-containing medium and imaged at the indicated times. All hexose transporter genes were tagged at the chromosomal locus by homologous recombination, and their expression was driven by their endogenous promoter (Hxt1-GFP: ySL1186; Hxt2-GFP: ySL1140; Hxt3-GFP: ySL1027; Hxt4-GFP: ySL1852; Hxt5-GFP: ySL1145; Hxt6-GFP: ySL1184; Hxt7-GFP: ySL1551). (B) WT (ySL1145) and *csr2-1* cells (ySL2065) expressing Hxt5-GFP were grown overnight in glucose medium and switched to lactate medium for the indicated time and images by fluorescence microscopy. (C) From the experiment presented in B, immunoblots were realized from total cell lysates using anti-GFP and anti-PGK antibodies. (D) GFP signals were quantified ( $\pm$  SEM) at 7- and 24-h time points ( $n = 3$  independent experiments).

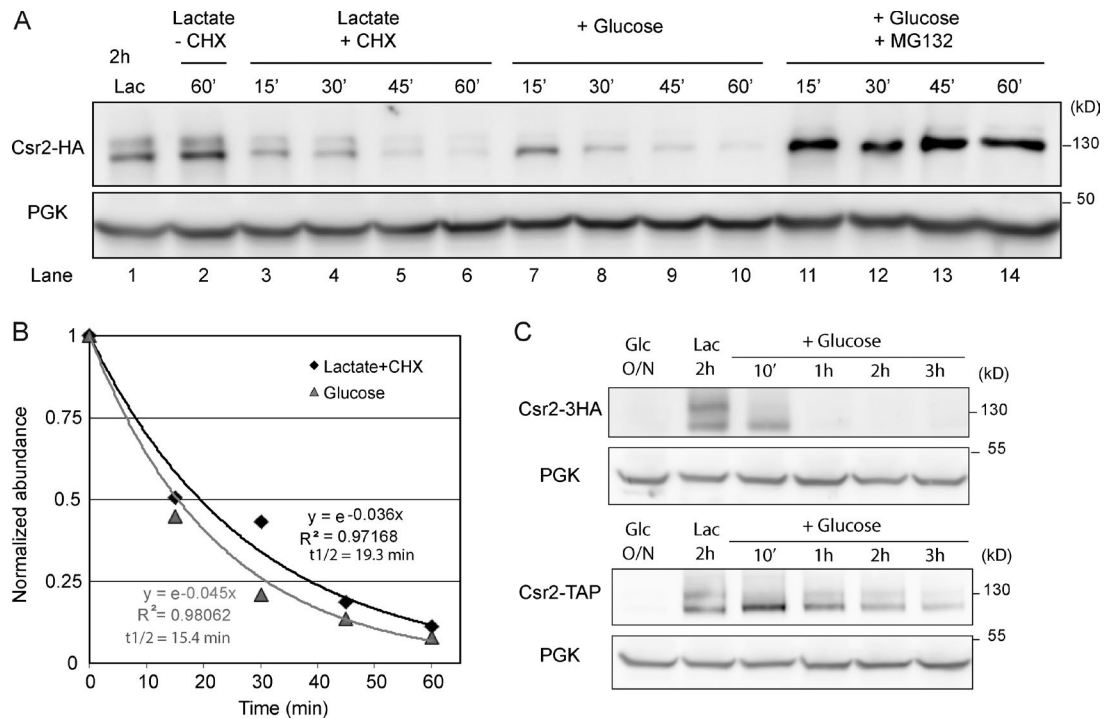

Figure S3. **Csr2-3HA is a short-lived protein.** (A) WT cells expressing Csr2-3HA (*pdr5Δ* background; ySL1826) were grown in glucose medium and were switched to lactate-containing medium for 2 h to induce Csr2-3HA synthesis (lane 1). They were then treated with cycloheximide (CHX) for various times (up to 1 h, lanes 3–6). As a control, no cycloheximide was added for 1 h (lane 2). Another batch of cells were treated with glucose for various times (up to 1 h, lanes 7–10) to repress Csr2-3HA expression. A similar experiment was performed in the presence of the proteasome inhibitor, MG-132 (lanes 11–14). (B) The blot displayed in A (nonsaturated blot acquired using a LAS-4000 imaging system) was used for quantification of band intensities and normalized to the initial Csr2-3HA signal (lane 1). The distribution of normalized abundance over time is shown, as well as exponential fits and its parameters, and the calculated half-life ( $t_{1/2}$ ). (C) WT cells expressing either Csr2-3HA (ySL1037, top) or Csr2-TAP (ySL1741, bottom) were grown in glucose medium and were switched to lactate-containing medium for 2 h. They were then treated with glucose for the indicated times. Total cell lysates were prepared at the indicated times and immunoblotted with anti-HA (top) or anti-peroxidase antibodies (PAP, bottom) and anti-PGK antibodies. Note that even though Csr2-TAP ubiquitylation vanishes at  $t = 10$  min glucose treatment, it reappears at later time points, suggesting that the loss of Csr2 ubiquitylation is part of an early glucose response.

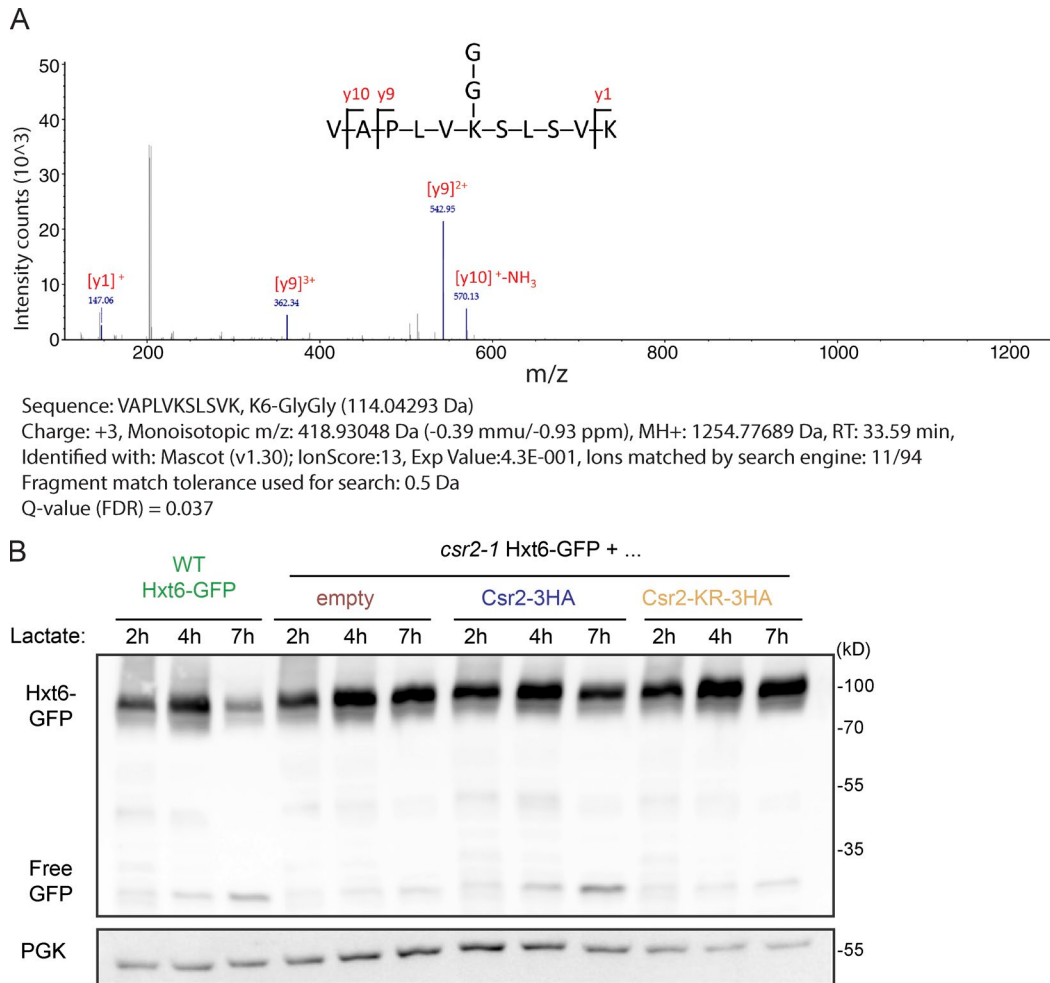

Figure S4. **Identification of the ubiquitylation site on Csr2.** (A) An immunoprecipitation was performed using lactate-grown *Csr2*-3HA cells (ySL1037) as starting material (see Materials and methods). The tandem mass spectrometry spectrum showing the intensities of the fragmented ions provides evidence of a diglycine remnant owing to Csr2 ubiquitylation at Lys670. Other features of this peptide are provided. FDR, false discovery rate. (B) From the experiment presented in Fig. 8 C, immunoblots were done on total cell lysates using anti-GFP and anti-PGK antibodies.

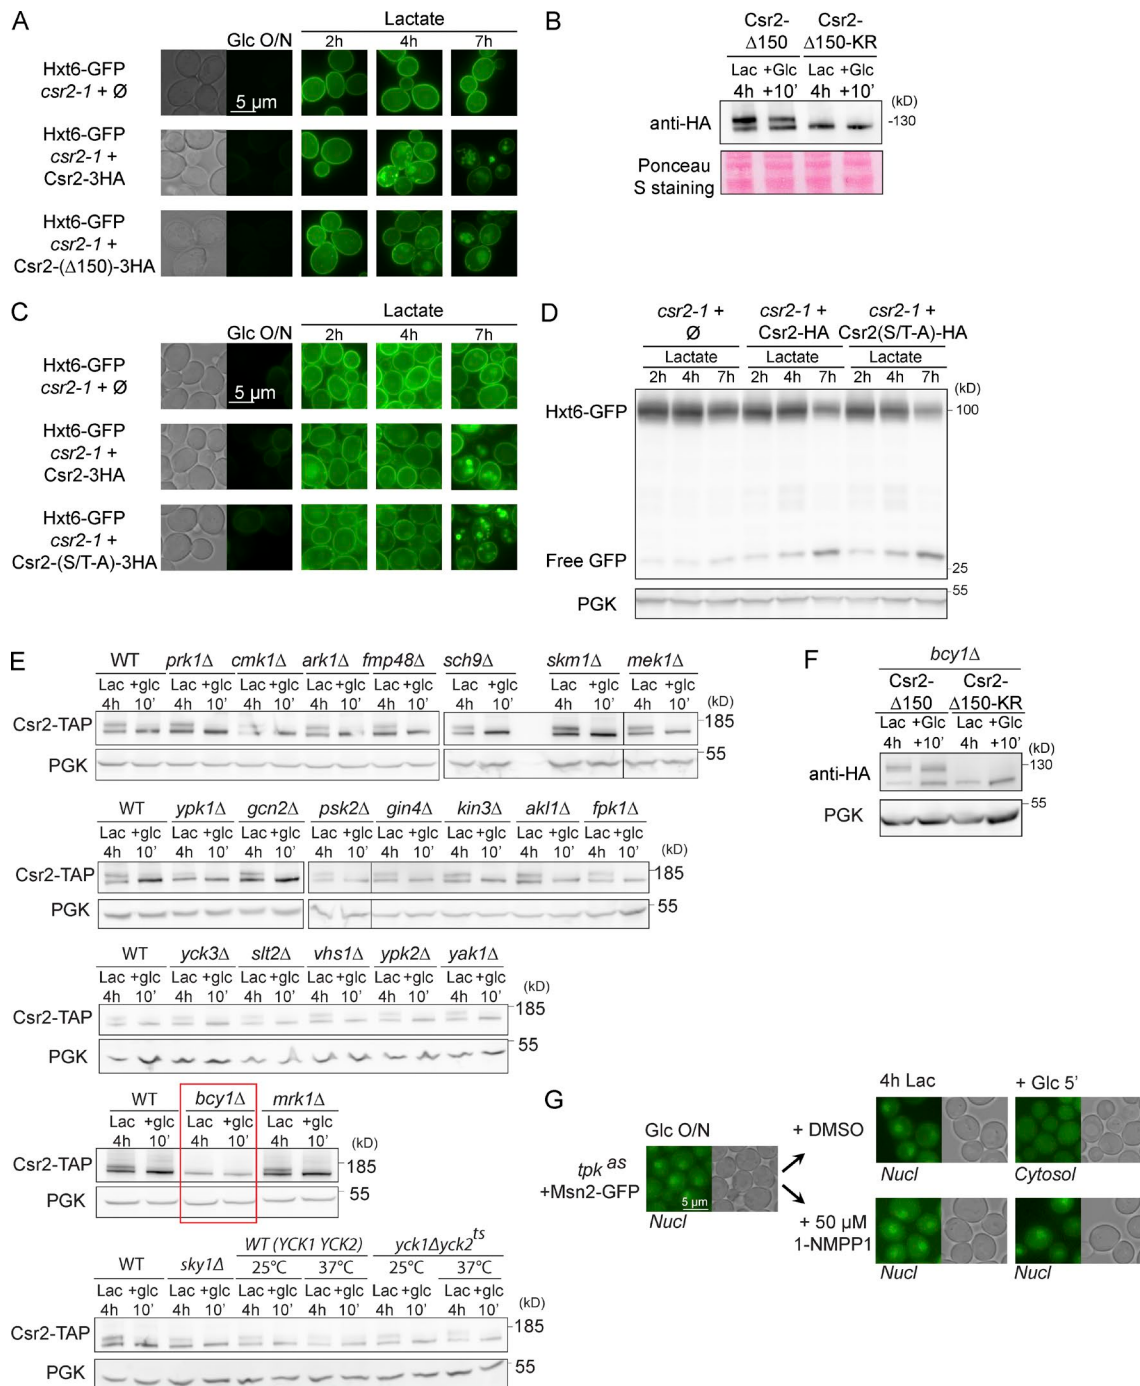

**Figure S5. Study of the N-terminal region of Csr2.** (A) *csr2-1* cells expressing Hxt6-GFP transformed with an empty plasmid (ySL1876) or a plasmid encoding either a full-length Csr2-3HA (ySL1714) or devoid of its first 150 residues in N-terminal (ySL1828) were grown in glucose medium and were switched to lactate-containing medium. They were imaged for Hxt6-GFP localization at the indicated times. (B) Glucose-grown WT cells expressing a truncated Csr2-3HA construct (Δ150), in which the conserved K670 residue is mutated or not (ySL1830 or ySL1818, respectively) were switched to lactate-containing medium for 4 h and then treated with glucose for 10 min. Total cell lysates were prepared at the indicated times and immunoblotted with anti-HA antibody. A scan of the Ponceau stain is provided as a loading control. (C) Glucose-grown *csr2-1* cells expressing Hxt6-GFP and either no Csr2, Csr2-3HA, or Csr2(S/T-A) (ySL1721, ySL1714, and ySL1849, respectively) were grown in glucose medium, switched to lactate-containing medium, and imaged at the indicated times. (D) From the experiment presented in C total cell lysates were prepared at the indicated times and immunoblotted using anti-GFP and anti-PGK antibodies. (E) Screening of kinase mutants potentially regulating Csr2 ubiquitylation. Mutant strains expressing a plasmid-encoded Csr2-TAP construct (see Table S2) were grown in glucose medium and switched to lactate-containing medium for 4 h. They were then treated with glucose for 10 min. Immunoblots were realized on total cell lysates using PAP and PGK (loading control) antibodies. (F) Evidence that the N-terminal region of Csr2 is required for the constitutive deubiquitylation of Csr2 observed in the *bcy1Δ* mutant: *bcy1Δ* cells expressing HA-tagged Csr2(Δ150) (ySL2070) or Csr2(Δ150,KR) (ySL2071) were grown in glucose medium and switched to lactate-containing medium for 4 h. They were then treated with glucose for 10 min. Immunoblots were realized on total cell lysates using anti-HA and anti-PGK (loading control) antibodies. (G) Evidence that PKA activity is induced during a lactate/glucose shift: WT (ySL2087) or *tpk<sup>as</sup>* mutant cells (ySL2088) expressing Msn2 was grown overnight in glucose-containing medium (exponential phase), then switched to lactate-containing medium and treated with 50 μM 1-NMPP1 (or an equivalent volume of DMSO as a negative control) for 4 h. Glucose was added back (final concentration 2%), and cells were imaged at the indicated times.

Table S1. List of yeast strains, per figure

| Figure  | Yeast strains                                                                                                                                                 |
|---------|---------------------------------------------------------------------------------------------------------------------------------------------------------------|
| Fig. 1  | (A) ySL1184, ySL1551; (B) ySL1184; (C) ySL1184, ySL1643, ySL1539; (D) ySL1315, ySL1698, ySL1790, ySL1688; (E) ySL1184, ySL1706, ySL1551, ySL1718              |
| Fig. 2  | (A–D) ySL1184, ySL1706                                                                                                                                        |
| Fig. 3  | (A) ySL2027, ySL2028, ySL2023, ySL2025; (B) ySL2023; (C) ySL1643, ySL1809; (E) ySL1833, ySL1835                                                               |
| Fig. 4  | (A) ySL1186, ySL1187, ySL1027, ySL1058; (C): ySL1140, ySL1654, ySL1852, ySL1853                                                                               |
| Fig. 5  | (A) ySL1037; (B): ySL1184, ySL1551; (C) ySL1188; (D) ySL1188, ySL1189 ySL1190; (E) ySL1188, ySL1779, ySL1816, ySL1780; (F) ySL1037, ySL1191, ySL1192; ySL1774 |
| Fig. 6  | (A) ySL1037, ySL1726; (B) ySL1184, ySL1734; (E) ySL1184; (F) ySL1953                                                                                          |
| Fig. 7  | (A) ySL1212; (B) ySL1037, ySL1210; (C) ySL1655, ySL1680; (D) ySL820                                                                                           |
| Fig. 8  | (B) ySL1655, ySL1677; (C) ySL1345, ySL1721, ySL1714, ySL1716; (E) ySL2023, ySL2026                                                                            |
| Fig. 9  | (A and B) ySL1037; (C) ySL1037, ySL1043; (D) ySL1043, ySL1896, ySL1897                                                                                        |
| Fig. 10 | (B) ySL1826, ySL1827; (C) ySL1655, ySL1848; (D) ySL1655, ySL2021, ySL1848, ySL2043; (E) ySL2085, ySL2086; (F) ySL1876, ySL1877, ySL1881                       |

For supplemental figures, please refer to their legends.

Table S2. Description of the yeast strains used in this study

| Name/description                                                      | Genotype                                                                                                                                                          | Origin/reference                                |
|-----------------------------------------------------------------------|-------------------------------------------------------------------------------------------------------------------------------------------------------------------|-------------------------------------------------|
| ySL820 WT + <i>p<sub>CUP1</sub>::6xHis-Ubi</i>                        | Mat a, <i>his3Δ1 leu2Δ0 met15Δ0 ura3Δ0</i> (pSL206: <i>p<sub>CUP1</sub>::6xHis-Ubi, URA3</i> )                                                                    | This study                                      |
| ySL1027 Hxt3-GFP                                                      | Mat a, <i>his3Δ1, leu2Δ0, met15Δ0, ura3Δ0, HXT3::GFP-HIS3MX6</i>                                                                                                  | GFP collection (Huh et al., 2003)               |
| ySL1037 Csr2-3HA                                                      | Mat a, <i>his3Δ1, leu2Δ0, met15Δ0, ura3Δ0, CSR2-3HA::kanMX4</i>                                                                                                   | This study                                      |
| ySL1043 <i>ubp2Δ</i> Csr2-3HA                                         | Mat a, <i>his3Δ1, leu2Δ0, lysΔ0, ura3Δ0, ubp2Δ::HISMX3; CSR2-3HA::kanMX</i>                                                                                       | This study                                      |
| ySL1058 <i>csr2Δ</i> Hxt3-GFP                                         | Mat a, <i>his3Δ1, leu2Δ0, met15Δ0, ura3Δ0, csr2Δ::kanMX6, HXT3::GFP-HIS3MX6</i>                                                                                   | This study                                      |
| ySL1140 Hxt5-GFP                                                      | Mat a, <i>his3Δ1, leu2Δ0, met15Δ0, ura3Δ0, HXT5::HIS3MX6</i>                                                                                                      | GFP collection (Huh et al., 2003)               |
| ySL1145 Hxt5-GFP                                                      | Mat a, <i>his3Δ1, leu2Δ0, met15Δ0, ura3Δ0, HXT5::GFP-HIS3MX6</i>                                                                                                  | GFP collection (Huh et al., 2003)               |
| ySL1184 Hxt6-GFP                                                      | Mat a, <i>his3Δ1, leu2Δ0, met15Δ0, ura3Δ0, HXT6::GFP-HIS3MX6</i>                                                                                                  | This study                                      |
| ySL1185 <i>csr2Δ</i> Hxt6-GFP                                         | Mat a, <i>his3Δ1, leu2Δ0, met15Δ0, ura3Δ0, csr2Δ::kanMX, HXT6::GFP-HIS3MX6</i>                                                                                    | This study                                      |
| ySL1186 Hxt1-GFP                                                      | Mat a, <i>his3Δ1, leu2Δ0, met15Δ0, ura3Δ0, HXT1::GFP-HIS3MX6</i>                                                                                                  | This study                                      |
| ySL1187 <i>csr2Δ</i> Hxt1-GFP                                         | Mat a, <i>his3Δ1, leu2Δ0, met15Δ0, ura3Δ0, HXT1::GFP-HIS3MX6 csr2Δ::kanMX</i>                                                                                     | This study                                      |
| ySL1188 WT + <i>p<sub>CSR2</sub>::lacZ</i>                            | Mat a, <i>his3Δ1, leu2Δ0, met15Δ0, ura3Δ0</i> (pSL168, <i>URA3</i> )                                                                                              | This study                                      |
| ySL1189 <i>snf1Δ</i> + <i>p<sub>CSR2</sub>::lacZ</i>                  | Mat a, <i>his3Δ1, leu2Δ0, met15Δ0, ura3Δ0, snf1Δ::kanMX</i> (pSL168, <i>URA3</i> )                                                                                | This study                                      |
| ySL1190 <i>reg1Δ</i> + <i>p<sub>CSR2</sub>::lacZ</i>                  | Mat a, <i>his3Δ1, leu2Δ0, met15Δ0, ura3Δ0, reg1Δ::HIS3MX6</i> (pSL168, <i>URA3</i> )                                                                              | This study                                      |
| ySL1191 <i>snf1Δ</i> Csr2-3HA                                         | Mat a, <i>his3Δ1, leu2Δ0, met15Δ0, ura3Δ0, CSR2-3HA::kanMX, snf1Δ::hphNT1</i>                                                                                     | This study                                      |
| ySL1192 <i>reg1Δ</i> Csr2-3HA                                         | Mat a, <i>his3Δ1, leu2Δ0, met15Δ0, ura3Δ0, CSR2-3HA::kanMX, reg1Δ::HIS3MX6</i>                                                                                    | This study                                      |
| ySL1210 <i>npi1</i> Csr2-3HA                                          | Mat a, <i>his3Δ1, leu2Δ0, met15Δ0, ura3Δ0, p<sub>RSP5</sub>::HIS3MX6; CSR2-3HA::kanMX</i>                                                                         | This study                                      |
| ySL1212 Csr2-3HA + <i>p<sub>CUP1</sub>::6xHis-Ubi</i>                 | Mat a, <i>his3Δ1, leu2Δ0, met15Δ0, ura3Δ0, CSR2-3HA::kanMX</i> (pSL206, <i>URA3</i> )                                                                             | This study                                      |
| ySL1315 Hxt6-GFP + pRS416                                             | Mat a, <i>his3Δ1, leu2Δ0, met15Δ0, ura3Δ0, HXT6::GFP-HIS3MX</i> (pRHT95, <i>URA3</i> )                                                                            | This study                                      |
| ySL1316 <i>csr2Δ</i> Hxt6-GFP + pRS416                                | Mat a, <i>his3Δ1, leu2Δ0, met15Δ0, ura3Δ0, csr2Δ::kanMX, HXT6::GFP-HIS3MX</i> (pRHT95, <i>URA3</i> )                                                              | This study                                      |
| ySL1345 Hxt6-GFP + pRS315                                             | Mat a, <i>his3Δ1, leu2Δ0, met15Δ0, ura3Δ0, Hxt6::GFP-HIS3MX</i> (pRHT91, <i>LEU2</i> )                                                                            | This study                                      |
| ySL1539 <i>npi1</i> Hxt6-GFP                                          | Mat a, <i>his3Δ1, leu2Δ0, met15Δ0, ura3Δ0, p<sub>RSP5</sub>::kanMX, HXT6::HIS3MX6</i>                                                                             | This study                                      |
| ySL1551 Hxt7-GFP                                                      | Mat a, <i>his3Δ1, leu2Δ0, met15Δ0, ura3Δ0, HXT7-GFP::hphNT1</i>                                                                                                   | This study                                      |
| ySL1552 <i>csr2Δ</i> Hxt7-GFP                                         | Mat a, <i>his3Δ1, leu2Δ0, met15Δ0, ura3Δ0, csr2Δ::kanMX, HXT7-GFP::hphNT1</i>                                                                                     | This study                                      |
| ySL1643 <i>vrp1Δ</i> Hxt6-GFP                                         | Mat a, <i>his3Δ1, leu2Δ0, lys2Δ0, ura3Δ0, vrp1Δ::kanMX; HXT6-GFP::HIS3MX6</i>                                                                                     | This study                                      |
| ySL1650 <i>ecm21Δ</i> Hxt6-GFP                                        | Mat a, <i>his3Δ1, leu2Δ0, met15Δ0, ura3Δ0, ecm21Δ::hphNT1, HXT6::GFP-HIS3MX6</i>                                                                                  | This study                                      |
| ySL1653 <i>csr2Δ</i> Hxt5-GFP                                         | Mat a, <i>his3Δ1, leu2Δ0, met15Δ0, ura3Δ0, csr2Δ::hphNT1, HXT5::GFP-HIS3MX6</i>                                                                                   | This study                                      |
| ySL1654 <i>csr2Δ</i> Hxt2-GFP                                         | Mat a, <i>his3Δ1, leu2Δ0, met15Δ0, ura3Δ0, HXT2::GFP-HIS3MX6, csr2Δ::hphNT1</i>                                                                                   | This study                                      |
| ySL1655 WT + <i>p<sub>CSR2</sub>::CSR2-3HA</i>                        | Mat a, <i>his3Δ1, leu2Δ0, met15Δ0, ura3Δ0</i> (pSL308, <i>LEU2</i> )                                                                                              | This study                                      |
| ySL1670 <i>csr2Δ</i> Hxt6-GFP + p416-pCSR2                            | Mat a, <i>his3Δ1, leu2Δ0, met15Δ0, ura3Δ0, csr2Δ::kanMX, HXT6::GFP-HIS3MX</i> (pSL316, <i>URA3</i> )                                                              | This study                                      |
| ySL1677 WT + <i>p<sub>CSR2</sub>::CSR2(KR)-3HA</i>                    | Mat a, <i>his3Δ1, leu2Δ0, met15Δ0, ura3Δ0</i> (pSL318, <i>LEU2</i> )                                                                                              | This study                                      |
| ySL1680 WT + <i>p<sub>CSR2</sub>::CSR2(PYm)-3HA</i>                   | Mat a, <i>his3Δ1, leu2Δ0, met15Δ0, ura3Δ0</i> (pSL319, <i>LEU2</i> )                                                                                              | This study                                      |
| ySL1688 <i>9arrestinΔ</i> Hxt6-GFP + pRS416-CSR2                      | Mat a, <i>ura3, leu2, art1Δ, ecm21Δ::kanMX, aly1Δ, rod1Δ, art5Δ, aly2Δ, rog3::natMX; csr2Δ::kanMX, art10Δ::HIS, bsd2Δ HXT6-GFP::hphNT1</i> (pSL316, <i>URA3</i> ) | This study (9arrestinΔ: Nikko and Pelham, 2009) |
| ySL1692 <i>csr2Δ</i> Hxt6-GFP + YGPM32j02                             | Mat a, <i>his3Δ1, leu2Δ0, met15Δ0, ura3Δ0, csr2Δ::kanMX, HXT6::GFP-HIS3MX6</i> + YGPM32j02 (pSL315, <i>LEU2</i> )                                                 | This study                                      |
| ySL1693 <i>csr2Δ</i> Hxt6-GFP + YGPM19n08                             | Mat a, <i>his3Δ1, leu2Δ0, met15Δ0, ura3Δ0, csr2Δ::kanMX, HXT6::GFP-HIS3MX6</i> + YGPM19n08 (pSL358, <i>LEU2</i> )                                                 | This study                                      |
| ySL1698 <i>9arrestinΔ</i> Hxt6-GFP + pRS416                           | Mat a, <i>ura3, leu2, art1Δ, ecm21Δ::kanMX, aly1Δ, rod1Δ, art5Δ, aly2Δ, rog3::natMX; csr2Δ::kanMX, art10Δ::HIS, bsd2Δ HXT6-GFP::hphNT1</i> (pRHT95, <i>URA3</i> ) | This study                                      |
| ySL1706 <i>csr2-1</i> Hxt6-GFP                                        | Mat a, <i>his3Δ1, leu2Δ0, met15Δ0, ura3Δ0, csr2-1::kanMX, HXT6::GFP-HIS3MX</i>                                                                                    | This study                                      |
| ySL1714 <i>csr2-1</i> Hxt6-GFP + <i>p<sub>CSR2</sub>::CSR2-3HA</i>    | Mat a, <i>his3Δ1, leu2Δ0, met15Δ0, ura3Δ0, csr2-1::kanMX, HXT6::GFP-HIS3MX</i> (pSL308, <i>LEU2</i> )                                                             | This study                                      |
| ySL1716 <i>csr2-1</i> Hxt6-GFP + <i>p<sub>CSR2</sub>::CSR2-KR-3HA</i> | Mat a, <i>his3Δ1, leu2Δ0, met15Δ0, ura3Δ0, csr2-1::kanMX, HXT6::GFP-HIS3MX</i> (pSL318, <i>LEU2</i> )                                                             | This study                                      |
| ySL1717 <i>csr2-1-3HA</i> Hxt6-GFP                                    | Mat a, <i>his3Δ1, leu2Δ0, met15Δ0, ura3Δ0, csr2-1::kanMX, CSR2::3HA-hphNT1, HXT6::GFP-HIS3MX</i>                                                                  | This study                                      |
| ySL1721 <i>csr2-1</i> Hxt6-GFP + pRS315                               | Mat a, <i>his3Δ1, leu2Δ0, met15Δ0, ura3Δ0, csr2-1::kanMX, HXT6::GFP-HIS3MX</i> (pRHT91, <i>LEU2</i> )                                                             | This study                                      |
| ySL1726 <i>p<sub>TEF</sub>::CSR2-3HA</i>                              | Mat a, <i>his3Δ1, leu2Δ0, met15Δ0, ura3Δ0, p<sub>CSR2</sub>::natNT2-pTEF, CSR2:3HA::kanMX4</i>                                                                    | This study                                      |
| ySL1734 Hxt6-GFP <i>p<sub>TEF</sub>::CSR2</i> Hxt6-GFP                | Mat a, <i>his3Δ1, leu2Δ0, met15Δ0, ura3Δ0, p<sub>CSR2</sub>::natNT2-pTEF, HXT6::GFP-HIS3MX6</i>                                                                   | This study                                      |
| ySL1741 Csr2-TAP                                                      | Mat a, <i>his3Δ1, leu2Δ0, met15Δ0, ura3Δ0, CSR2-TAP::kanMX</i>                                                                                                    | This study                                      |
| ySL1774 <i>mig1Δmig2Δ</i> Csr2-3HA                                    | Mat a, <i>his3Δ1, leu2Δ0, met15Δ0, ura3Δ0, mig1Δ::hphNT1, mig2Δ::HIS3MX6, CSR2-3HA::kanMX4</i>                                                                    | This study                                      |

Table S2. Description of the yeast strains used in this study (Continued)

| Name/description                                                                | Genotype                                                                                                                                                                                                                                                 | Origin/reference |
|---------------------------------------------------------------------------------|----------------------------------------------------------------------------------------------------------------------------------------------------------------------------------------------------------------------------------------------------------|------------------|
| ySL1779 <i>mig1Δ</i> + <i>p<sub>CSR2</sub>lacZ</i>                              | Mat a, <i>his3Δ1</i> , <i>leu2Δ0</i> , <i>met15Δ0</i> , <i>ura3Δ0</i> , <i>mig1Δ::hphNT1</i> <i>CSR2-3HA::kanMX4</i> (pSL168, URA3)                                                                                                                      | This study       |
| ySL1780 <i>mig1Δmig2Δ</i> + <i>p<sub>CSR2</sub>lacZ</i>                         | Mat a, <i>his3Δ1</i> , <i>leu2Δ0</i> , <i>met15Δ0</i> , <i>ura3Δ0</i> , <i>mig1Δ::hphNT1</i> , <i>mig2Δ::HIS3MX6</i> , <i>CSR2-3HA::kanMX4</i> (pSL168, URA3)                                                                                            | This study       |
| ySL1790 <i>9arrestinΔ</i> Hxt6-GFP + <i>p<sub>ECM21</sub>:ECM21-3HA</i>         | Mat a, <i>ura3</i> , <i>leu2</i> , <i>art1Δ</i> , <i>ecm21Δ::kanMX</i> , <i>aly1Δ</i> , <i>rod1Δ</i> , <i>art5Δ</i> , <i>aly2Δ</i> , <i>rog3::natMX</i> ; <i>csr2Δ::kanMX</i> , <i>art10Δ::HIS</i> , <i>bsd2Δ</i> <i>HXT6-GFP::hphNT1</i> (pSL324, LEU2) | This study       |
| ySL1809 <i>vrp1Δ</i> <i>csr2-1</i> Hxt6-GFP                                     | Mat a, <i>his3Δ1</i> , <i>leu2Δ0</i> , <i>lys2Δ0</i> , <i>ura3Δ0</i> , <i>vrp1Δ::kanMX</i> ; <i>HXT6-GFP::HIS3MX6</i> <i>csr2-1::kanMX</i>                                                                                                               | This study       |
| ySL1810 <i>mig1Δ</i> <i>mig2Δ</i> Hxt6-GFP                                      | Mat a, <i>his3Δ1</i> , <i>leu2Δ0</i> , <i>met15Δ0</i> , <i>ura3Δ0</i> , <i>mig1Δ::hphNT1</i> ; <i>mig2Δ::KanMX</i> ; <i>HXT6::GFP-HIS3MX6</i>                                                                                                            | This study       |
| ySL1811 <i>mig1Δ</i> <i>mig2Δ</i> <i>csr2-1</i> Hxt6-GFP                        | Mat a, <i>his3Δ1</i> , <i>leu2Δ0</i> , <i>met15Δ0</i> , <i>ura3Δ0</i> , <i>mig1Δ::hphNT1</i> ; <i>mig2Δ::KanMX</i> ; <i>csr2-1::NAT</i> ; <i>HXT6::GFP-HIS3MX6</i>                                                                                       | This study       |
| ySL1816 <i>mig2Δ</i> + <i>p<sub>CSR2</sub>lacZ</i>                              | Mat a, <i>his3Δ1</i> , <i>leu2Δ0</i> , <i>met15Δ0</i> , <i>ura3Δ0</i> , <i>mig2Δ::HIS3MX6</i> , <i>CSR2-3HA::kanMX4</i>                                                                                                                                  | This study       |
| ySL1818 WT + <i>p<sub>CSR2</sub>CSR2(Δ150)-3HA</i>                              | Mat a, <i>his3Δ1</i> , <i>leu2Δ0</i> , <i>met15Δ0</i> , <i>ura3Δ0</i> (pSL325, LEU2)                                                                                                                                                                     | This study       |
| ySL1826 <i>pdr5Δ</i> + <i>p<sub>CSR2</sub>CSR2-3HA</i>                          | Mat a, <i>his3Δ1</i> , <i>leu2Δ0</i> , <i>met15Δ0</i> , <i>ura3Δ0</i> , <i>pdr5Δ::HIS3MX6</i> (pSL325, LEU2)                                                                                                                                             | This study       |
| ySL1827 <i>pdr5Δ</i> + <i>p<sub>CSR2</sub>CSR2(Δ150)-3HA</i>                    | Mat a, <i>his3Δ1</i> , <i>leu2Δ0</i> , <i>met15Δ0</i> , <i>ura3Δ0</i> , <i>pdr5Δ::HIS3MX6</i> (pSL308, LEU2)                                                                                                                                             | This study       |
| ySL1828 Hxt6-GFP <i>csr2-1</i> + <i>p<sub>CSR2</sub>CSR2(Δ150)-3HA</i>          | Mat a, <i>his3Δ1</i> , <i>leu2Δ0</i> , <i>met15Δ0</i> , <i>ura3Δ0</i> , <i>csr2-1::kanMX</i> , <i>HXT6::GFP-HIS3MX6</i> , (pSL325, LEU2)                                                                                                                 | This study       |
| ySL1830 WT + <i>p<sub>CSR2</sub>CSR2(Δ150,KR)-3HA</i>                           | Mat a, <i>his3Δ1</i> , <i>leu2Δ0</i> , <i>met15Δ0</i> , <i>ura3Δ0</i> (pSL345, LEU2)                                                                                                                                                                     | This study       |
| ySL1833 <i>vrp1Δ</i> Hxt6-GFP + <i>p<sub>CUP1</sub>:6xHis-Ubi</i>               | <i>vrp1Δ::kanMX</i> ; <i>HXT6::GFP-HIS3MX6</i> , Mat a, <i>lys</i> , <i>met</i> ? (pSL206: <i>p<sub>CUP1</sub>:6xHis-Ubi</i> , URA3)                                                                                                                     | This study       |
| ySL1835 <i>vrp1Δ</i> <i>csr2-1</i> Hxt6-GFP + <i>p<sub>CUP1</sub>:6xHis-Ubi</i> | Mat a, <i>his3Δ1</i> , <i>leu2Δ0</i> , <i>lys2Δ0</i> , <i>ura3Δ0</i> , <i>vrp1Δ::kanMX</i> , <i>csr2-1::kanMX</i> , <i>HXT6::GFP-HIS3MX6</i> (pSL206, URA3)                                                                                              | This study       |
| ySL1848 WT + <i>p<sub>CSR2</sub>:CSR2(S/T-A)-3HA</i>                            | Mat a, <i>his3Δ1</i> , <i>leu2Δ0</i> , <i>lys2Δ0</i> , <i>ura3Δ0</i> (pSL351, LEU2)                                                                                                                                                                      | This study       |
| ySL1849 <i>csr2-1</i> Hxt6-GFP + <i>p<sub>CSR2</sub>CSR2(S/T-A)-3HA</i>         | Mat a, <i>his3Δ1</i> , <i>leu2Δ0</i> , <i>met15Δ0</i> , <i>ura3Δ0</i> , <i>csr2-1::kanMX</i> , <i>HXT6::GFP-HIS3MX</i> (pSL351, LEU2)                                                                                                                    | This study       |
| ySL1852 Hxt4-GFP                                                                | Mat a, <i>his3Δ1</i> , <i>leu2Δ0</i> , <i>met15Δ0</i> , <i>ura3Δ0</i> , <i>HXT4::GFP-HIS3MX6</i>                                                                                                                                                         | This study       |
| ySL1853 <i>csr2-1</i> Hxt4-GFP                                                  | Mat a, <i>his3Δ1</i> , <i>leu2Δ0</i> , <i>met15Δ0</i> , <i>ura3Δ0</i> , <i>HXT4::GFP-HIS3MX6</i> , <i>csr2-1::kanMX</i>                                                                                                                                  | This study       |
| ySL1876 <i>csr2-1</i> Hxt6-GFP + pRS315                                         | Mat a, <i>his3Δ1</i> , <i>leu2Δ0</i> , <i>met15Δ0</i> , <i>ura3Δ0</i> , <i>csr2-1::kanMX</i> , <i>HXT6::GFP-HIS3MX</i> (pRHT91, LEU2)                                                                                                                    | This study       |
| ySL1877 <i>csr2-1</i> Hxt6-GFP + <i>p<sub>CSR2</sub>:CSR2-TAP</i>               | Mat a, <i>his3Δ1</i> , <i>leu2Δ0</i> , <i>met15Δ0</i> , <i>ura3Δ0</i> , <i>csr2-1::kanMX</i> , <i>HXT6::GFP-HIS3MX</i> (pSL386, LEU2)                                                                                                                    | This study       |
| ySL1881 <i>csr2-1</i> Hxt6-GFP + <i>p<sub>CSR2</sub>:CSR2(S/T-A)-TAP</i>        | Mat a, <i>his3Δ1</i> , <i>leu2Δ0</i> , <i>met15Δ0</i> , <i>ura3Δ0</i> , <i>csr2-1::kanMX</i> , <i>HXT6::GFP-HIS3MX</i> ( <i>p<sub>CSR2</sub>:CSR2(S/T-A)-TAP</i> , CEN, LEU2)                                                                            | This study       |
| ySL1896 <i>ubp2Δ</i> <i>Csr2-3HA</i> + <i>p<sub>CUP1</sub>:Ub-WT</i>            | Mat a, <i>his3Δ1</i> , <i>leu2Δ0</i> , <i>lys2Δ0</i> , <i>ura3Δ0</i> , <i>ubp2Δ::HISMX3</i> , <i>CSR2-3HA::kanMX</i> (pRHT86, LYS2)                                                                                                                      | This study       |
| ySL1897 <i>ubp2Δ</i> <i>Csr2-3HA</i> + <i>p<sub>CUP1</sub>:Ub-K63R</i>          | Mat a, <i>his3Δ1</i> , <i>leu2Δ0</i> , <i>lys2Δ0</i> , <i>ura3Δ0</i> , <i>ubp2Δ::HISMX3</i> , <i>CSR2-3HA::kanMX</i> (pRHT88, LYS2)                                                                                                                      | This study       |
| ySL1933 Hxt6-GFP + <i>p<sub>CSR2</sub>:CSR2-3HA</i>                             | Mat a, <i>his3Δ1</i> , <i>leu2Δ0</i> , <i>met15Δ0</i> , <i>ura3Δ0</i> , <i>HXT6::GFP-HIS3MX6</i>                                                                                                                                                         | This study       |
| ySL1982 <i>gin4Δ</i> + <i>p<sub>CSR2</sub>:CSR2-TAP</i>                         | Mat a, <i>his3Δ1</i> , <i>leu2Δ0</i> , <i>met15Δ0</i> , <i>ura3Δ0</i> , <i>gin4Δ::KanMX</i> (pSL386, LEU2)<br>[ <i>gin4Δ</i> /ySL1957 = deletion collection, checked by PCR]                                                                             | This study       |
| ySL1983 <i>ypk2Δ</i> + <i>p<sub>CSR2</sub>:CSR2-TAP</i>                         | Mat a, <i>his3Δ1</i> , <i>leu2Δ0</i> , <i>met15Δ0</i> , <i>ura3Δ0</i> , <i>ypk2Δ::KanMX</i> (pSL386, LEU2)<br>[ <i>ypk2Δ</i> /ySL1958 = deletion collection, checked by PCR]                                                                             | This study       |
| ySL1985 <i>yak1Δ</i> + <i>p<sub>CSR2</sub>:CSR2-TAP</i>                         | Mat a, <i>his3Δ1</i> , <i>leu2Δ0</i> , <i>met15Δ0</i> , <i>ura3Δ0</i> , <i>yak1Δ::KanMX</i> (pSL386, LEU2)<br>[ <i>yak1Δ</i> /ySL1960 = deletion collection, checked by PCR]                                                                             | This study       |
| ySL1986 <i>slt2Δ</i> + <i>p<sub>CSR2</sub>:CSR2-TAP</i>                         | Mat a, <i>his3Δ1</i> , <i>leu2Δ0</i> , <i>met15Δ0</i> , <i>ura3Δ0</i> , <i>slt2Δ::KanMX</i> (pSL386, LEU2)<br>[ <i>slt2Δ</i> /ySL1961 = deletion collection, checked by PCR]                                                                             | This study       |
| ySL1987 <i>ark1Δ</i> + <i>p<sub>CSR2</sub>:CSR2-TAP</i>                         | Mat a, <i>his3Δ1</i> , <i>leu2Δ0</i> , <i>met15Δ0</i> , <i>ura3Δ0</i> , <i>ark1Δ::KanMX</i> (pSL386, LEU2)<br>[ <i>ark1Δ</i> /ySL1962 = deletion collection, checked by PCR]                                                                             | This study       |
| ySL1988 <i>akl1Δ</i> + <i>p<sub>CSR2</sub>:CSR2-TAP</i>                         | Mat a, <i>his3Δ1</i> , <i>leu2Δ0</i> , <i>met15Δ0</i> , <i>ura3Δ0</i> , <i>akl1Δ::KanMX</i> (pSL386, LEU2)<br>[ <i>akl1Δ</i> /ySL1963 = deletion collection, checked by PCR]                                                                             | This study       |
| ySL1989 <i>fpk1Δ</i> + <i>p<sub>CSR2</sub>:CSR2-TAP</i>                         | Mat a, <i>his3Δ1</i> , <i>leu2Δ0</i> , <i>met15Δ0</i> , <i>ura3Δ0</i> , <i>fpk1Δ::KanMX</i> (pSL386, LEU2)<br>[ <i>fpk1Δ</i> /ySL1964 = deletion collection, checked by PCR]                                                                             | This study       |
| ySL1990 <i>prk1Δ</i> + <i>p<sub>CSR2</sub>:CSR2-TAP</i>                         | Mat a, <i>his3Δ1</i> , <i>leu2Δ0</i> , <i>met15Δ0</i> , <i>ura3Δ0</i> , <i>prk1Δ::KanMX</i> (pSL386, LEU2)<br>[ <i>prk1Δ</i> /ySL1965 = deletion collection, checked by PCR]                                                                             | This study       |
| ySL1991 <i>fmp48Δ</i> + <i>p<sub>CSR2</sub>:CSR2-TAP</i>                        | Mat a, <i>his3Δ1</i> , <i>leu2Δ0</i> , <i>met15Δ0</i> , <i>ura3Δ0</i> , <i>fmp48Δ::KanMX</i> (pSL386, LEU2)<br>[ <i>fmp48Δ</i> /ySL1966 = deletion collection, checked by PCR]                                                                           | This study       |
| ySL1992 <i>cmk1Δ</i> + <i>p<sub>CSR2</sub>:CSR2-TAP</i>                         | Mat a, <i>his3Δ1</i> , <i>leu2Δ0</i> , <i>met15Δ0</i> , <i>ura3Δ0</i> , <i>cmk1Δ::KanMX</i> (pSL386, LEU2)<br>[ <i>cmk1Δ</i> /ySL1967 = deletion collection, checked by PCR]                                                                             | This study       |
| ySL1993 <i>yck3Δ</i> + <i>p<sub>CSR2</sub>:CSR2-TAP</i>                         | Mat a, <i>his3Δ1</i> , <i>leu2Δ0</i> , <i>met15Δ0</i> , <i>ura3Δ0</i> , <i>yck3Δ::KanMX</i> (pSL386, LEU2)<br>[ <i>yck3Δ</i> /ySL1968 = deletion collection, checked by PCR]                                                                             | This study       |
| ySL1994 <i>vhs1Δ</i> + <i>p<sub>CSR2</sub>:CSR2-TAP</i>                         | Mat a, <i>his3Δ1</i> , <i>leu2Δ0</i> , <i>met15Δ0</i> , <i>ura3Δ0</i> , <i>vhs1Δ::KanMX</i> (pSL386, LEU2)<br>[ <i>vhs1Δ</i> /ySL1969 = deletion collection, checked by PCR]                                                                             | This study       |

Table S2. Description of the yeast strains used in this study (Continued)

| Name/description                                                           | Genotype                                                                                                                                                                                   | Origin/reference                        |
|----------------------------------------------------------------------------|--------------------------------------------------------------------------------------------------------------------------------------------------------------------------------------------|-----------------------------------------|
| ySL1995 <i>sch9Δ</i> + <i>p<sub>CSR2</sub></i> :CSR2-TAP                   | Mat α, <i>his3Δ1</i> , <i>leu2Δ0</i> , <i>met15Δ0</i> , <i>ura3Δ0</i> , <i>sch9Δ</i> :: <i>KanMX</i> (pSL386, <i>LEU2</i> ) [ <i>sch9Δ</i> /ySL1970 = deletion collection, checked by PCR] | This study                              |
| ySL1996 <i>psk2Δ</i> + <i>p<sub>CSR2</sub></i> :CSR2-TAP                   | Mat α, <i>his3Δ1</i> , <i>leu2Δ0</i> , <i>met15Δ0</i> , <i>ura3Δ0</i> , <i>psk2Δ</i> :: <i>KanMX</i> (pSL386, <i>LEU2</i> ) [ <i>psk2Δ</i> /ySL1971 = deletion collection, checked by PCR] | This study                              |
| ySL1997 <i>mek1Δ</i> + <i>p<sub>CSR2</sub></i> :CSR2-TAP                   | Mat α, <i>his3Δ1</i> , <i>leu2Δ0</i> , <i>met15Δ0</i> , <i>ura3Δ0</i> , <i>mek1Δ</i> :: <i>KanMX</i> (pSL386, <i>LEU2</i> ) [ <i>mek1Δ</i> /ySL1972 = deletion collection, checked by PCR] | This study                              |
| ySL1998 <i>skm1Δ</i> + <i>p<sub>CSR2</sub></i> :CSR2-TAP                   | Mat α, <i>his3Δ1</i> , <i>leu2Δ0</i> , <i>met15Δ0</i> , <i>ura3Δ0</i> , <i>skm1Δ</i> :: <i>KanMX</i> (pSL386, <i>LEU2</i> ) [ <i>skm1Δ</i> /ySL1973 = deletion collection, checked by PCR] | This study                              |
| ySL1999 <i>kin3Δ</i> + <i>p<sub>CSR2</sub></i> :CSR2-TAP                   | Mat α, <i>his3Δ1</i> , <i>leu2Δ0</i> , <i>met15Δ0</i> , <i>ura3Δ0</i> , <i>kin3Δ</i> :: <i>KanMX</i> (pSL386, <i>LEU2</i> ) [ <i>kin3Δ</i> /ySL1974 = deletion collection, checked by PCR] | This study                              |
| ySL2000 WT YCK + <i>p<sub>CSR2</sub></i> :CSR2-TAP                         | Mat α <i>his3 leu2 ura3-52</i> (LRB341) (pSL386, <i>LEU2</i> )                                                                                                                             | This study (LRB341: Panek et al., 1997) |
| ySL2001 <i>yck1Δ yck2<sup>ts</sup></i> + <i>p<sub>CSR2</sub></i> :CSR2-TAP | Mat α <i>his3 leu2 ura3-52 yck1-1::ura3 yck2-2ts</i> (LRB362) (pSL386, <i>LEU2</i> )                                                                                                       | This study (LRB362: Panek et al., 1997) |
| ySL2021 <i>bcy1Δ</i> + <i>p<sub>CSR2</sub></i> :CSR2-TAP                   | Mat α, <i>his3Δ1</i> , <i>leu2Δ0</i> , <i>met15Δ0</i> , <i>ura3Δ0</i> , <i>bcy1Δ</i> :: <i>KanMX</i> (pSL386, <i>LEU2</i> ) [ <i>bcy1Δ</i> /ySL2019 = deletion collection, checked by PCR] | This study                              |
| ySL2022 <i>mrk1Δ</i> + <i>p<sub>CSR2</sub></i> :CSR2-TAP                   | Mat α, <i>his3Δ1</i> , <i>leu2Δ0</i> , <i>met15Δ0</i> , <i>ura3Δ0</i> , <i>mrk1Δ</i> :: <i>KanMX</i> (pSL386, <i>LEU2</i> ) [ <i>mrk1Δ</i> /ySL2020 = deletion collection, checked by PCR] | This study                              |
| ySL2023 Hxt6-VC + <i>p<sub>TEF</sub></i> :Csr2-VN                          | Mat α, <i>his3Δ1</i> , <i>leu2Δ0</i> , <i>met15Δ0</i> , <i>ura3Δ0</i> , <i>HXT6-VC</i> :: <i>KanMX</i> (pSL391, <i>LEU2</i> )                                                              | This study                              |
| ySL2025 <i>vrp1Δ</i> Hxt6-VC + <i>p<sub>TEF</sub></i> :Csr2-VN             | Mat α, <i>his3Δ1</i> , <i>leu2Δ0</i> , <i>met15Δ0</i> , <i>ura3Δ0</i> , <i>vrp1Δ</i> :: <i>hphNT1 HXT6-VC</i> :: <i>KanMX</i> (pSL391, <i>LEU2</i> )                                       | This study                              |
| ySL2026 Hxt6-VC + <i>p<sub>TEF</sub></i> :Csr2(KR)-VN                      | Mat α, <i>his3Δ1</i> , <i>leu2Δ0</i> , <i>met15Δ0</i> , <i>ura3Δ0</i> , <i>HXT6-VC</i> :: <i>KanMX</i> (pSL393, <i>LEU2</i> )                                                              | This study                              |
| ySL2027 Hxt6-VC + <i>p<sub>TEF</sub></i> :VN                               | Mat α, <i>his3Δ1</i> , <i>leu2Δ0</i> , <i>met15Δ0</i> , <i>ura3Δ0</i> , <i>HXT6-VC</i> :: <i>KanMX</i> (pSL394, <i>LEU2</i> )                                                              | This study                              |
| ySL2028 <i>vrp1Δ</i> Hxt6-VC + <i>p<sub>TEF</sub></i> :VN                  | Mat α, <i>his3Δ1</i> , <i>leu2Δ0</i> , <i>met15Δ0</i> , <i>ura3Δ0</i> , <i>vrp1Δ</i> :: <i>hphNT1 HXT6-VC</i> :: <i>KanMX</i> (pSL394, <i>LEU2</i> )                                       | This study                              |
| ySL2031 <i>ypk1Δ</i> + <i>p<sub>CSR2</sub></i> :CSR2-TAP                   | Mat α, <i>his3Δ1</i> , <i>leu2Δ0</i> , <i>met15Δ0</i> , <i>ura3Δ0</i> , <i>ypk1Δ</i> :: <i>KanMX</i> (pSL386, <i>LEU2</i> ) [ <i>ypk1Δ</i> /ySL2029 = this study]                          | This study                              |
| ySL2032 <i>gcn2Δ</i> + <i>p<sub>CSR2</sub></i> :CSR2-TAP                   | Mat α, <i>his3Δ1</i> , <i>leu2Δ0</i> , <i>met15Δ0</i> , <i>ura3Δ0</i> , <i>gcn2Δ</i> :: <i>KanMX</i> (pSL386, <i>LEU2</i> ) [ <i>gcn2Δ</i> /ySL2030 = this study]                          | This study                              |
| ySL2043 <i>bcy1Δ</i> + <i>p<sub>CSR2</sub></i> :CSR2(S/T-A)-TAP            | Mat α, <i>his3Δ1</i> , <i>leu2Δ0</i> , <i>met15Δ0</i> , <i>ura3Δ0</i> , <i>bcy1Δ</i> :: <i>KanMX</i> (pSL387, <i>LEU2</i> )                                                                | This study                              |
| ySL2067 <i>csr2-1</i> Hxt5-GFP                                             | Mat α, <i>his3Δ1</i> , <i>leu2Δ0</i> , <i>met15Δ0</i> , <i>ura3Δ0</i> , <i>csr2-1</i> :: <i>hphNT1, HXT5::GFP-HIS3MX</i>                                                                   | This study                              |
| ySL2070 <i>bcy1Δ</i> + <i>p<sub>CSR2</sub></i> :CSR2(Δ150)-3HA             | Mat α, <i>his3Δ1</i> , <i>leu2Δ0</i> , <i>met15Δ0</i> , <i>ura3Δ0</i> , <i>bcy1Δ</i> :: <i>KanMX</i> (pSL325, <i>LEU2</i> )                                                                | This study                              |
| ySL2071 <i>bcy1Δ</i> + <i>p<sub>CSR2</sub></i> :CSR2(Δ150, KR)-3HA         | Mat α, <i>his3Δ1</i> , <i>leu2Δ0</i> , <i>met15Δ0</i> , <i>ura3Δ0</i> , <i>bcy1Δ</i> :: <i>KanMX</i> (pSL345, <i>LEU2</i> )                                                                | This study                              |
| ySL2085 WT (PKA) + <i>p<sub>CSR2</sub></i> :CSR2-TAP                       | Mat α <i>gal1::HIS3 ade2-1 can1-100 his3-11, 15 leu2-3, 112 trp1-1 GAL</i> (= Y2864) (pSL386, <i>LEU2</i> ) <i>trp1-1, GAL</i> ; mat α                                                     | This study (Y2864: Zaman et al., 2009)  |
| ySL2086 <i>pka<sup>as</sup></i> + <i>p<sub>CSR2</sub></i> :CSR2-TAP        | Mat α <i>ade2-1 can1-100 his3-11, 15 leu2-3, 112 trp1-1 ura3-1 tpk1<sup>M164G</sup> tpk2<sup>M147G</sup> tpk3<sup>M165G</sup></i> (=Y3561) (pSL386, <i>LEU2</i> )                          | This study (Y3561: Zaman et al., 2009)  |
| ySL2085 WT (PKA) + <i>p<sub>CSR2</sub></i> :CSR2-TAP                       | Mat α <i>gal1::HIS3 ade2-1 can1-100 his3-11, 15 leu2-3, 112 trp1-1 GAL</i> (= Y2864) (pSL386, <i>LEU2</i> )                                                                                | This study (Y2864: Zaman et al., 2009)  |
| ySL2086 <i>pka<sup>as</sup></i> + <i>p<sub>CSR2</sub></i> :CSR2-TAP        | Mat α <i>ade2-1 can1-100 his3-11, 15 leu2-3, 112 trp1-1 ura3-1 tpk1<sup>M164G</sup> tpk2<sup>M147G</sup> tpk3<sup>M165G</sup></i> (=Y3561) (pSL386, <i>LEU2</i> )                          | This study (Y3561: Zaman et al., 2009)  |

Table S3. **Plasmids used in this study**

| Name                     | Description                                                                                       | Origin/reference          |
|--------------------------|---------------------------------------------------------------------------------------------------|---------------------------|
| pSL168                   | <i>p<sub>CSR2</sub>::lacZ</i> , 2 $\mu$ , <i>URA3</i> (Yep358-based)                              | This study                |
| pSL206 (Yep352-6xHis-Ub) | <i>p<sub>CUP1</sub>::6xHis-Ubi</i> , 2 $\mu$ , <i>URA3</i> (Yep352-based)                         | Gwizdek et al., 2006      |
| pSL308                   | <i>p<sub>CSR2</sub>::CSR2-3HA</i> , CEN, <i>LEU2</i> (pRS415-based)                               | This study                |
| pSL315                   | Genomic clone YGPM32j02 in pGP564-based vector (genomic tiling collection; chr.XVI:625682-639002) | Jones et al., 2008        |
| pSL316                   | <i>p<sub>CSR2</sub>::CSR2</i> , CEN, <i>URA3</i> (pRS416-based; -500/+300)                        | This study                |
| pSL318                   | <i>p<sub>CSR2</sub>::CSR2-KR-3HA</i> , CEN, <i>LEU2</i> (pRS415-based)                            | This study                |
| pSL319                   | <i>p<sub>CSR2</sub>::CSR2-PYm-3HA</i> , CEN, <i>LEU2</i> (pRS415-based)                           | This study                |
| pSL324                   | <i>p<sub>ECM21</sub>::ECM21-3HA</i> , CEN, <i>LEU2</i> (pRS415-based)                             | This study                |
| pSL325                   | <i>p<sub>CSR2</sub>::CSR2(<math>\Delta</math>150)-3HA</i> , CEN, <i>LEU2</i> (pRS415-based)       | This study                |
| pSL345                   | <i>p<sub>CSR2</sub>::CSR2(<math>\Delta</math>150,KR)-3HA</i> , CEN, <i>LEU2</i> (pRS415-based)    | This study                |
| pSL351                   | <i>p<sub>CSR2</sub>::CSR2(S/T-A)-3HA</i> , CEN, <i>LEU2</i> (pRS415-based)                        | This study                |
| pSL358                   | Genomic clone YGPM19n08 in pGP564-based vector (genomic tiling collection; chr.XVI:618165-631521) | Jones et al., 2008        |
| pSL386                   | <i>p<sub>CSR2</sub>::CSR2-TAP</i> , CEN, <i>LEU2</i>                                              | This study                |
| pSL387                   | <i>p<sub>CSR2</sub>::CSR2(S/T-A)-TAP</i> , CEN, <i>LEU2</i>                                       | This study                |
| pSL391                   | pTEF::CSR2-VN, CEN, <i>LEU2</i> (pRS415-based)                                                    | This study                |
| pSL393                   | pTEF::CSR2-KR-VN, CEN, <i>LEU2</i> (pRS415-based)                                                 | This study                |
| pSL392                   | pTEF::VN, CEN, <i>LEU2</i> (pRS415-based)                                                         | This study                |
| pSL404                   | <i>P<sub>MSN2</sub>::MSN2-GFP</i> , CEN, <i>LEU2</i> (pRS415-based)                               | Durchschlag et al., 2004  |
| pRHT91                   | pRS315, CEN, <i>LEU2</i>                                                                          | Sikorski and Hieter, 1989 |
| pRHT95                   | pRS416, CEN, <i>URA3</i>                                                                          | Christianson et al., 1992 |

Table S4. **Primers used in this study**

| Plasmid number                               | Primer sequence (cloning)                                                                                                                                                                             |
|----------------------------------------------|-------------------------------------------------------------------------------------------------------------------------------------------------------------------------------------------------------|
| pSL168                                       | oSL437: 5'-TCCGGAATTCTATGGTGTTCAAGTCTTTCTCG-3'<br>oSL438: 5'-TCCGGGATCCCATGATTGACTTTGCTTACTAGTCTG-3'                                                                                                  |
| pSL316                                       | oSL713: 5'-GCCTCTCGAGACTTGTCCCAACCTCATTCC-3'<br>oSL714: 5'-GCCTTCTAGATAGGCCCATCATCTAATGAT-3'                                                                                                          |
| pSL318                                       | oSL715: 5'-CCTCTAGTAAGATCTTCTAGTGTCAAGAGAATTC-3'<br>oSL716: 5'-GACACTAAGAGATCTTACTAGAGGTGCCACTTGA-3'                                                                                                  |
| pSL319                                       | oSL448: 5'-ATACACAGCGAACCAGCCC-3'<br>oSL656: 5'-GCCTGTGCGACTTATGATGAAATCTCGTCAGCTCGAGGTGGTTCAG-3'<br>oSL662: 5'-TCTACCACCAGCTGGTATCGATCTTTTCGACC-3'<br>oSL663: 5'-ATCGATACCAGCTGGTGGTAGACTTGCAGCTT-3' |
| pSL324                                       | oSL751: 5'-TCCGCTCGAGTTCTTCATCACTCATCAAAGGCAC-3'<br>oSL770: 5'-TCCGACTAGTAAATTATTTCGACAGTC-3'                                                                                                         |
| pSL325                                       | oSL768: 5'-CCCGTCTAGAATGGTCGCGGCAAAACAAATATCTAG-3'<br>oSL440: 5'-GCCTCTCGAGTGATGAAATCTCGTCATATCTTGG-3'                                                                                                |
| pSL345                                       | oSL768: see above<br>oSL440: see above                                                                                                                                                                |
| pSL386                                       | oSL806: 5'-TCCAATAATTCATCCGGGCTCTGAACCACCAAGATATGACGAGATTTCATCACGTACGCTGCAGGTGCGAC-3'<br>oSL807: 5'-GGGGGGAGGGCGTGAATGTAAGCGTGACATACTAATTACATGACTCGACCTAAAGAGCCGCGGAATTCG-3'                          |
| pSL387                                       | oSL806: see above<br>oSL807: see above                                                                                                                                                                |
| pSL391                                       | oSL1007: 5'-TTGTTCTAGAATGCAATCTACTGTCCCA-3'<br>oSL1008: 5'-CGCCTCGAGTTACTCGATGTTGTGGCG-3'                                                                                                             |
| pSL392                                       | oSL1046: 5'-TTGTGGATCCATGAGATCCATCGCCACC-3'<br>oSL1047: 5'-CGCCTCGAGTTAACTTATAATACAACA-3'                                                                                                             |
| <b>Primer sequence (quantitative RT-PCR)</b> |                                                                                                                                                                                                       |
| oSL685                                       | 5'-CCAGCCCCTCTAATACAGCA-3'                                                                                                                                                                            |
| oSL686                                       | 5'-ACTCGCAACAAAGGAATCCG-3'                                                                                                                                                                            |
| oSL704                                       | 5'-ACGTTACCCAATTGAACACG-3'                                                                                                                                                                            |
| oSL705                                       | 5'-AGAACAGGGTGTTCTTCTGG-3'                                                                                                                                                                            |

## References

- Christianson, T.W., R.S. Sikorski, M. Dante, J.H. Shero, and P. Hieter. 1992. Multifunctional yeast high-copy-number shuttle vectors. *Gene*. 110:119–122. [http://dx.doi.org/10.1016/0378-1119\(92\)90454-W](http://dx.doi.org/10.1016/0378-1119(92)90454-W)
- Durchschlag, E., W. Reiter, G. Ammerer, and C. Schüller. 2004. Nuclear localization destabilizes the stress-regulated transcription factor Msn2. *J. Biol. Chem.* 279:55425–55432. <http://dx.doi.org/10.1074/jbc.M407264200>
- Gwizdek, C., N. Iglesias, M.S. Rodriguez, B. Ossareh-Nazari, M. Hobeika, G. Divita, F. Stutz, and C. Dargemont. 2006. Ubiquitin-associated domain of Mex67 synchronizes recruitment of the mRNA export machinery with transcription. *Proc. Natl. Acad. Sci. U S A*. 103:16376–16381. <http://dx.doi.org/10.1073/pnas.0607941103>
- Huh, W.K., J.V. Falvo, L.C. Gerke, A.S. Carroll, R.W. Howson, J.S. Weissman, and E.K. O'Shea. 2003. Global analysis of protein localization in budding yeast. *Nature*. 425:686–691. <http://dx.doi.org/10.1038/nature02026>
- Jones, G.M., J. Stalker, S. Humphray, A. West, T. Cox, J. Rogers, I. Dunham, and G. Prelich. 2008. A systematic library for comprehensive overexpression screens in *Saccharomyces cerevisiae*. *Nat. Methods*. 5:239–241. <http://dx.doi.org/10.1038/nmeth.1181>
- Nikko, E., and H.R. Pelham. 2009. Arrestin-mediated endocytosis of yeast plasma membrane transporters. *Traffic*. 10:1856–1867. <http://dx.doi.org/10.1111/j.1600-0854.2009.00990.x>
- Panek, H.R., J.D. Stepp, H.M. Engle, K.M. Marks, P.K. Tan, S.K. Lemmon, and L.C. Robinson. 1997. Suppressors of YCK-encoded yeast casein kinase 1 deficiency define the four subunits of a novel clathrin AP-like complex. *EMBO J*. 16:4194–4204. <http://dx.doi.org/10.1093/emboj/16.14.4194>
- Sikorski, R.S., and P. Hieter. 1989. A system of shuttle vectors and yeast host strains designed for efficient manipulation of DNA in *Saccharomyces cerevisiae*. *Genetics*. 122:19–27.
- Zaman, S., S.I. Lippman, L. Schneper, N. Slonim, and J.R. Broach. 2009. Glucose regulates transcription in yeast through a network of signaling pathways. *Mol. Syst. Biol.* 5:245. <http://dx.doi.org/10.1038/msb.2009.2>
